# Supplementary material for: Prevention of Diabetes by FTY720-Mediated Stabilization of Peri-Islet Tertiary Lymphoid Organs
Source: PubMed Central journal article supplement — Diabetes. 2010 Mar 18;59(6):1461–8. doi: 10.2337/db09-1129 (PMC2874707; doi:10.2337/db09-1129), 2010-03-18

**Supplemental Figure 1. Analysis of dendritic cells during FTY720 treatment.** Prediabetic 16-18 week old female NOD mice were treated with saline or 20 $\mu$ g FTY720 every other day for 10 days. On day 11 DCs were isolated as described in the materials and methods. A. Percentages of CD11c<sup>+</sup>B220<sup>-</sup> cells within the CD45<sup>+</sup>DAPI<sup>-</sup> population in islets, PLN and ILN are shown. Data pooled from two independent experiments. B. Expression of CD86, CD40, CD80 and I-A<sup>g7</sup> (MHC II) on CD11c<sup>+</sup>B220<sup>-</sup> DCs. Empty histograms represent control saline treated mice; filled histograms represent FTY720 treated mice.

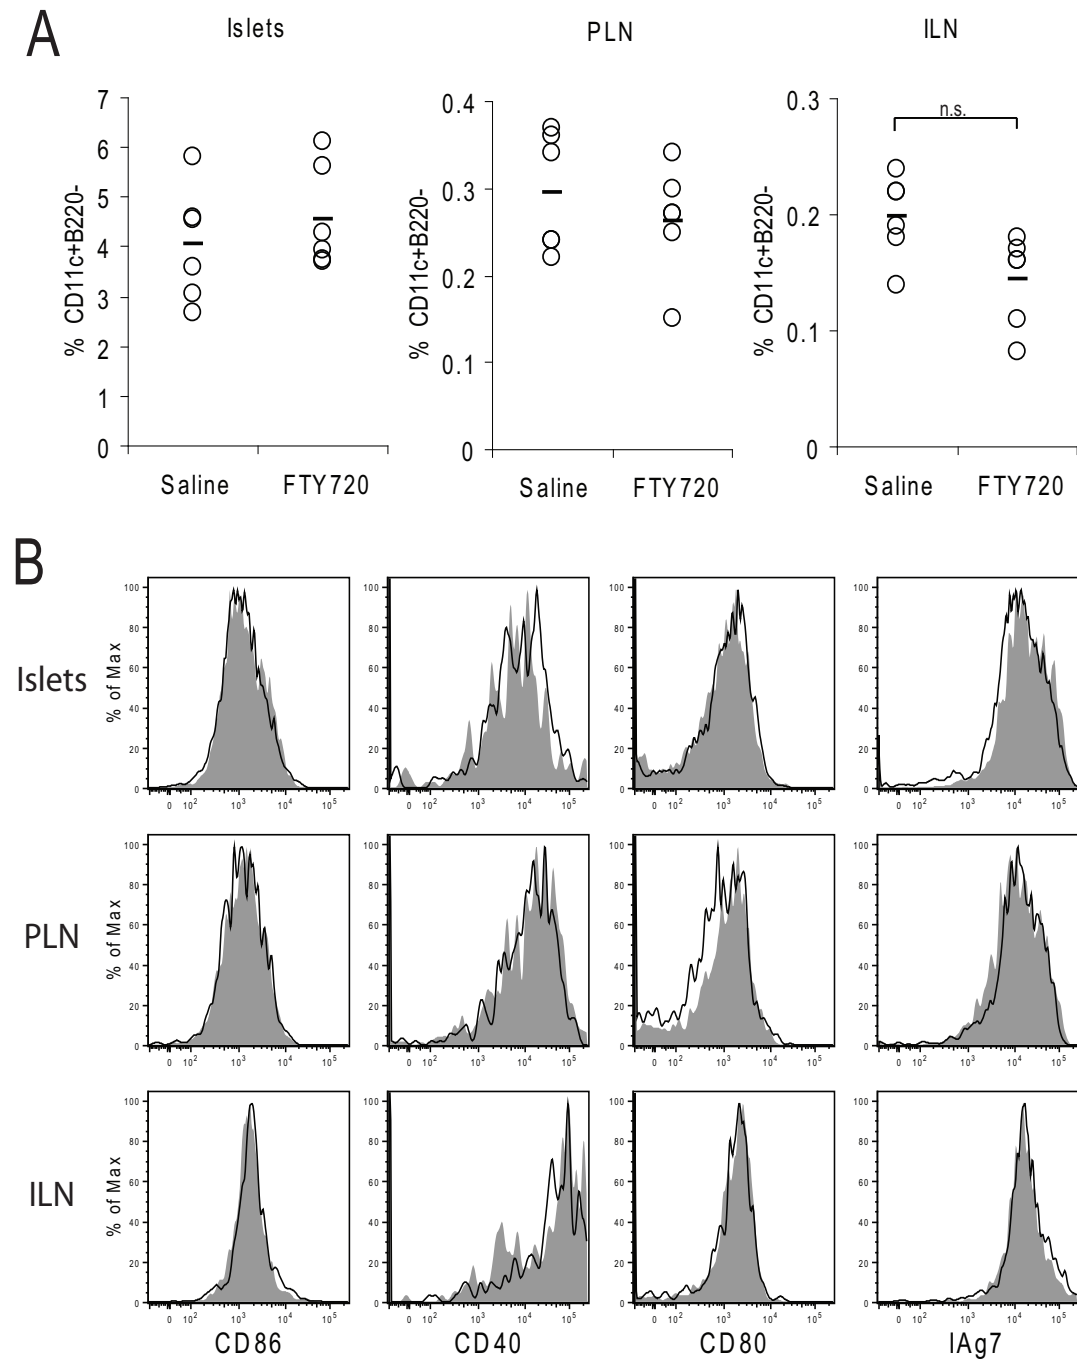

**Supplemental Figure 2. Quantification of islet association with MAdCAM and Lyve-1 positive vessels.** Pancreas sections were co-stained with anti-insulin and anti-MAdCAM or anti-insulin and anti-Lyve-1 antibodies. Insulin positive islets were scored as positive or negative based on their association with (A) MAdCAM<sup>+</sup> or (B) Lyve-1<sup>+</sup> vessels. 2-4 sections from 3-6 mice per group were analyzed. Error bars represent standard deviation. \* p<0.05 between RAG KO and all other groups.

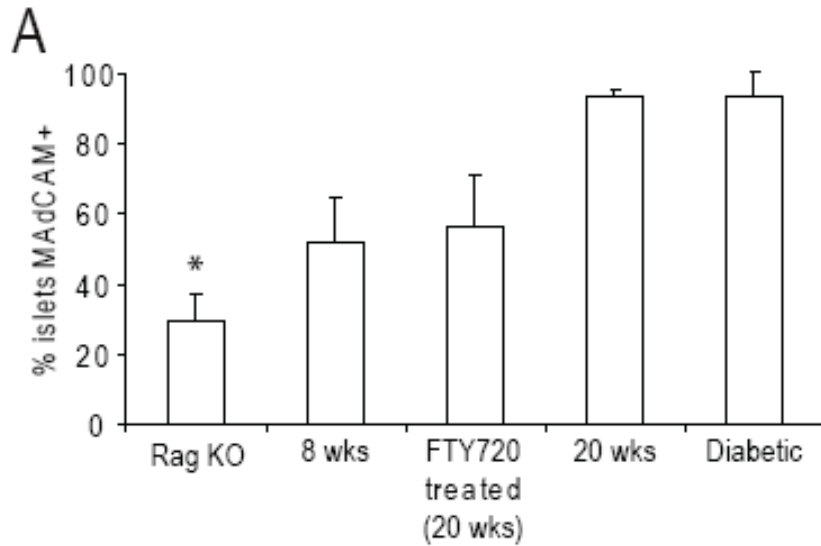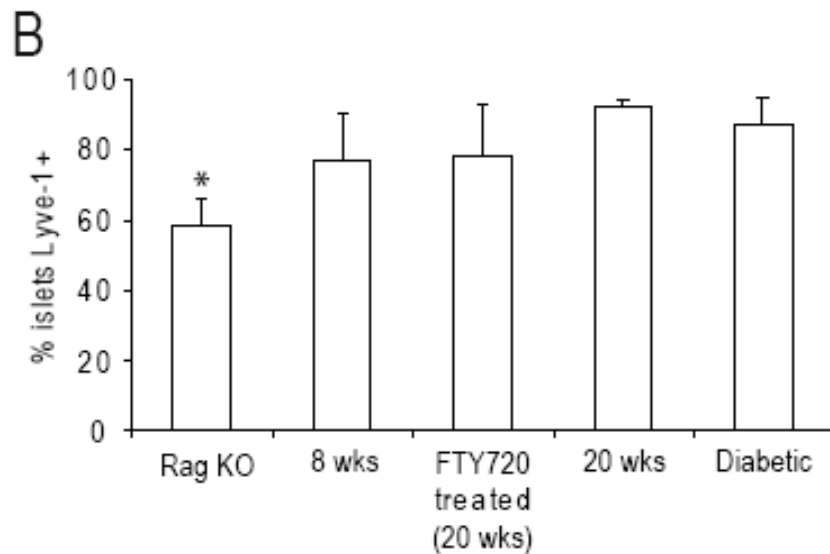

**Supplemental Figure 3. Analysis of pancreatic infiltrates in human diabetic patients.**

Sections were stained with anti-CD4 and anti-Insulin or anti-CD19 antibodies. Representative immunofluorescence images of consecutive sections stained with the indicated antibodies are shown on the top and are superimposed on hematoxylin counterstain bright field images on the bottom (green fluorophore appears as pink, red fluorophore appears as blue). Arrows point to individual cells.

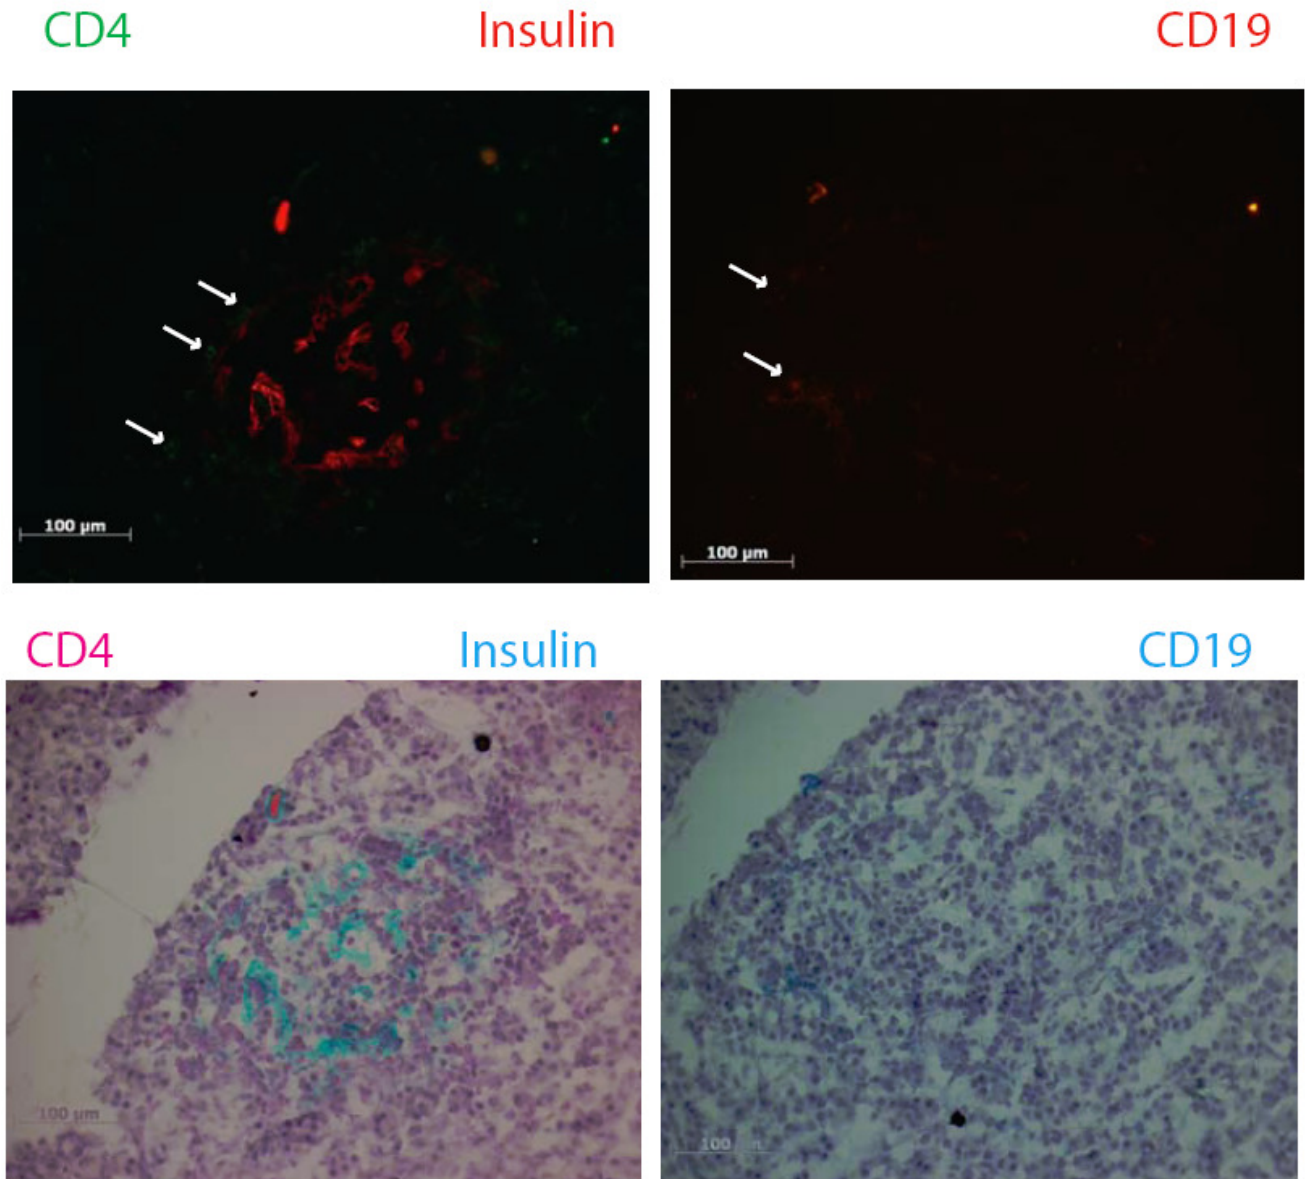

Supplement: supp_db09-1129_onlineappendix.pdf [file supp_db09-1129_onlineappendix.pdf]
